# Supplementary material for: Staggered trap arrays for robust microfluidic sample digitization
Source: Royal Society of Chemistry journal article supplement (doi:10.1039/c7lc00846e), 2017-01-01
Supplement: c7lc00846e1.pdf [file c7lc00846e1.pdf]

## Staggered Trap Arrays for Robust Microfluidic Sample Digitization

### Supplementary Information

Figures S1-S3 present the geometric models used to establish the relationships between physical system parameters, including contact angle ( $\theta_0$ ) and channel width ratio ( $CR$ ), and the resulting filling ratio ( $FR$ ) that defines the degree of intrusion of fluid into a given trap. For each model, the non-linear system of equations with associated constraints were solved in Mathematica to determine the fluid intrusion length ( $f$ ) for each design.

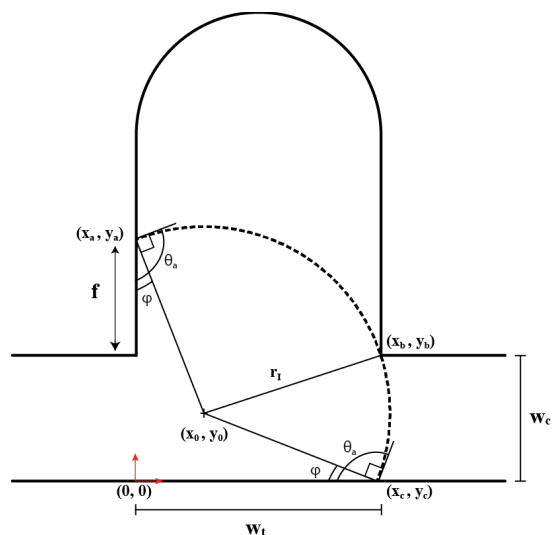

Assumptions: Constant interface curvature

Unknowns:  $x_0, y_0, y_a, r$

Knowns:  $x_a = 0, x_b = w_t, x_c = y_a, y_b = w_c, y_c = 0, \theta, \varphi$

Constraints:  $y_a \geq w_c, r_I \geq 0$

Equation 1:  $x_0^2 + (y_a - y_0)^2 = r_I^2$

Equation 2:  $(w_t - x_0)^2 + (w_c - y_0)^2 = r_I^2$

Equation 3:  $(y_a - x_0)^2 + y_0^2 = r_I^2$

Equation 4:  $\tan(\varphi) = \frac{x_0}{y_a - y_0}$

Solve:  $f = y_a - w_c$

**Figure S1.** Geometric model for a single-sided trap design.

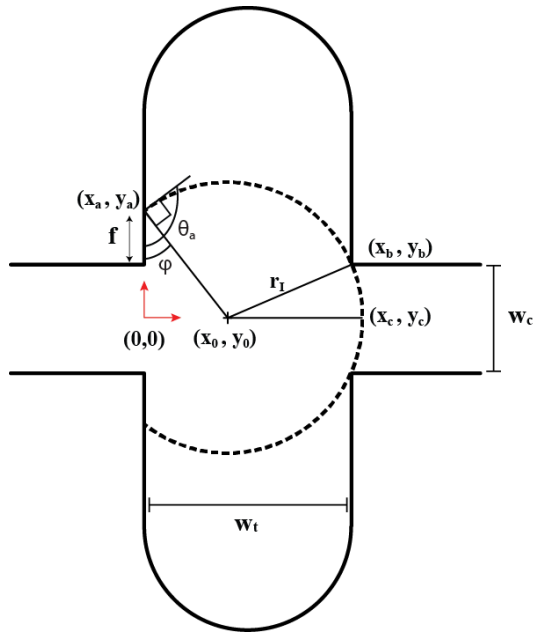

Assumptions: Constant interface curvature, symmetric advancement of interfaces along both trap walls

Unknowns:  $x_0, y_a, r$

Knowns:  $x_a = 0, x_b = w_t, y_0 = 0, y_b = \frac{w_c}{2}, y_c = 0, \theta, \varphi$

Constraints:  $y_a \geq \frac{w_c}{2}, r_I \geq 0, \theta_{lim}(CR)$

Equation 1:  $x_0^2 + y_a^2 = r_I^2$

Equation 2:  $(w_t - x_0)^2 + \left(\frac{w_c}{2}\right)^2 = r_I^2$

Equation 4:  $\tan(\varphi) = \frac{x_0}{y_a}$

Solve:  $f = y_a - \frac{w_c}{2}$

(a)

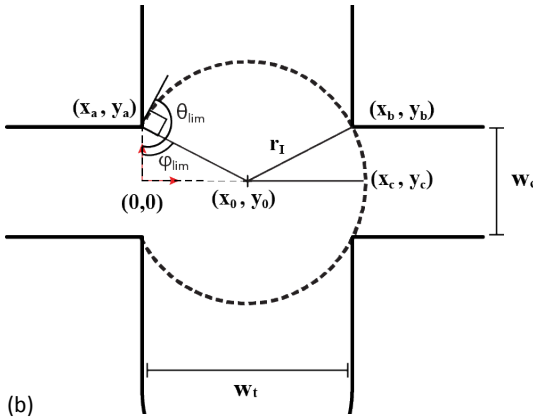

Constant curvature  $\rightarrow x_0 = \frac{w_t}{2}$  and  $y_a = \frac{w_c}{2}$

$\tan(\varphi_{lim}) = \frac{w_t}{w_c}$

$\theta_{lim} = \varphi_{lim} + \frac{\pi}{2}$

(b)

**Figure S2.** (a) Overall geometric model for a double-sided trap design, and (b) model for determining  $\theta_{lim}$ , defined as the upper limit of  $\theta_a$  above which fluid will not advance into the trap. Note that  $\theta_{lim}$  is a function of the channel width ratio.

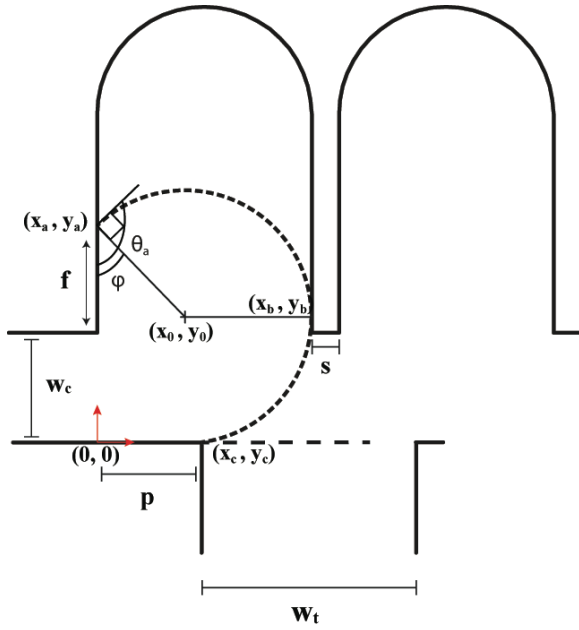

Assumptions: Constant interface curvature

Unknowns:  $x_0, y_0, y_a, r$

Knowns:  $x_a = 0, x_b = w_t, x_c = p, y_b = y_0, y_c = 0, \theta, \phi$

Constraints:  $y_a \geq w_c, r_I \geq 0, y_0 \geq w_c$

Equation 1:  $x_0^2 + (y_a^2 - y_0^2) = r_I^2$

Equation 2:  $(w_t - x_0)^2 = r_I^2$

Equation 3:  $(p - x_0)^2 + y_0^2 = r_I^2$

Equation 4:  $\tan(\phi) = \frac{x_0}{y_a - y_0}$

Solve:  $f = y_a - w_c$

(a)

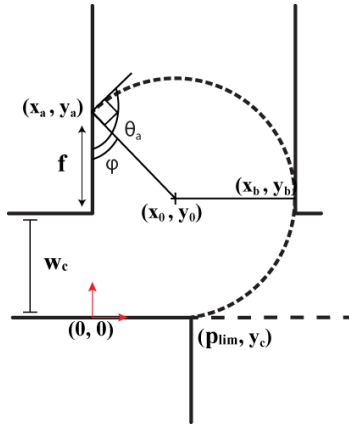

Assumptions: Constant interface curvature

Unknowns:  $x_0, y_0, y_a, r$

Knowns:  $x_a = 0, x_b = w_t, y_a = p_{lim}, y_c = 0, \theta, \phi$

Constraints:  $y_a \geq w_c, r_I \geq 0$

Equation 1:  $x_0^2 + (p_{lim} - y_0)^2 = r_I^2$

Equation 2:  $(w_t - x_0)^2 + (w_c - y_0)^2 = r_I^2$

Equation 3:  $(p_{lim} - x_0)^2 + y_0^2 = r_I^2$

Equation 4:  $\tan(\phi) = \frac{x_0}{p_{lim} - y_0}$

Solve for  $p_{lim}$  (FR,  $\theta_a$ ) using the single sided model. If  $p > p_{lim}$  then pinning does not occur for that configuration.

(b)

**Figure S3.** (a) Geometric model for a staggered trap design. (b) Derivation for the  $p_{lim}$  which determines at what  $p$  the staggered configuration will act as a single sided configuration because the pinning point is not reached before the interface contacts the opposite wall. Note that  $p_{lim}$  is a function of the filling ratio and advancing contact angle.

**Table S1.** Loading efficiency data for staggered, double-sided, and single-sided trap configurations at different channel width ratios and maximum filling ratios (see Figure 6). Data is presented for the case where (a) the main channel is identical to the trap depth, and (b) the main channel depth is greater than the trap depth.

(a)

| Design | FR ( $f/w_c$ ) | CR ( $w_c/w_t$ ) | Config    | Filling % for each experiment |      |      |      |      | Mean | $\sigma$ |
|--------|----------------|------------------|-----------|-------------------------------|------|------|------|------|------|----------|
|        |                |                  |           | 1                             | 2    | 3    | 4    | 5    |      |          |
|        | 0.49           | 0.55             | Double    | 100%                          | 100% | 100% | 100% | 100% | 100% | 0%       |
|        | 0.64           | 0.55             | Double    | 97%                           | 100% | 100% | 100% | 97%  | 99%  | 2%       |
|        | 0.73           | 0.55             | Double    | 93%                           | 100% | 90%  | 90%  | 97%  | 94%  | 4%       |
|        | 0.88           | 0.55             | Double    | 97%                           | 100% | 97%  | 100% | 90%  | 97%  | 4%       |
|        | 1.06           | 0.55             | Double    | 50%                           | 47%  | 57%  | 77%  | 67%  | 59%  | 11%      |
|        | 1.17           | 0.55             | Double    | 47%                           | 63%  | 60%  | 57%  | 63%  | 58%  | 6%       |
|        | 1.31           | 0.55             | Double    | 33%                           | 41%  | 40%  | 53%  | 27%  | 39%  | 9%       |
|        | 0.65           | 0.55             | Single    | 100%                          | 100% | 100% | 100% | 100% | 100% | 0%       |
|        | 0.76           | 0.55             | Single    | 100%                          | 100% | 100% | 100% | 100% | 100% | 0%       |
|        | 0.88           | 0.55             | Single    | 93%                           | 93%  | 100% | 80%  | 73%  | 88%  | 10%      |
|        | 1.06           | 0.55             | Single    | 27%                           | 0%   | 0%   | 7%   | 0%   | 7%   | 10%      |
|        | 1.17           | 0.55             | Single    | 0%                            | 47%  | 47%  | 33%  | 33%  | 32%  | 17%      |
|        | 1.31           | 0.55             | Single    | 0%                            | 0%   | 0%   | 0%   | 0%   | 0%   | 0%       |
|        | 1.59           | 0.55             | Single    | 0%                            | 0%   | 0%   | 0%   | 0%   | 0%   | 0%       |
|        | 0.88           | 0.59             | Staggered | 100%                          | 100% | 100% | 100% | 100% | 100% | 0%       |
|        | 1.06           | 0.59             | Staggered | 100%                          | 100% | 100% | 100% | 100% | 100% | 0%       |
|        | 1.17           | 0.59             | Staggered | 97%                           | 100% | 97%  | 97%  | 100% | 98%  | 2%       |
|        | 1.31           | 0.59             | Staggered | 97%                           | 97%  | 97%  | 100% | 97%  | 97%  | 1%       |
|        | 1.59           | 0.59             | Staggered | 55%                           | 48%  | 28%  | 31%  | 31%  | 39%  | 11%      |

(b)

| Design | FR (f/w <sub>i</sub> ) | CR (w <sub>i</sub> /w <sub>i</sub> ) | Config    | Filling % for each experiment |      |      |      |      | Mean | σ   |
|--------|------------------------|--------------------------------------|-----------|-------------------------------|------|------|------|------|------|-----|
|        |                        |                                      |           | 1                             | 2    | 3    | 4    | 5    |      |     |
|        | 0.49                   | 0.55                                 | Double    | 100%                          | 93%  | 100% | 100% | 100% | 99%  | 3%  |
|        | 0.64                   | 0.55                                 | Double    | 100%                          | 100% | 100% | 100% | 100% | 100% | 0%  |
|        | 0.73                   | 0.55                                 | Double    | 100%                          | 100% | 100% | 90%  | 100% | 98%  | 4%  |
|        | 0.88                   | 0.55                                 | Double    | 97%                           | 100% | 97%  | 100% | 90%  | 97%  | 4%  |
|        | 1.06                   | 0.55                                 | Double    | 53%                           | 57%  | 53%  | 87%  | 83%  | 67%  | 15% |
|        | 1.17                   | 0.55                                 | Double    | 53%                           | 40%  | 53%  | 57%  | 53%  | 51%  | 6%  |
|        | 1.31                   | 0.55                                 | Double    | 53%                           | 33%  | 37%  | 53%  | 40%  | 43%  | 8%  |
|        | 0.88                   | 0.55                                 | Single    | 100%                          | 93%  | 93%  | 87%  | 100% | 95%  | 5%  |
|        | 1.06                   | 0.55                                 | Single    | 40%                           | 33%  | 53%  | 53%  | 33%  | 43%  | 9%  |
|        | 1.17                   | 0.55                                 | Single    | 20%                           | 60%  | 53%  | 13%  | 20%  | 33%  | 19% |
|        | 1.31                   | 0.55                                 | Single    | 7%                            | 13%  | 20%  | 20%  | 20%  | 16%  | 5%  |
|        | 1.59                   | 0.55                                 | Single    | 40%                           | 0%   | 0%   | 27%  | 7%   | 15%  | 16% |
|        | 0.88                   | 0.55                                 | Staggered | 100%                          | 100% | 100% | 100% | 100% | 100% | 0%  |
|        | 1.06                   | 0.55                                 | Staggered | 100%                          | 100% | 90%  | 100% | 100% | 98%  | 4%  |
|        | 1.17                   | 0.55                                 | Staggered | 90%                           | 86%  | 100% | 100% | 100% | 95%  | 6%  |
|        | 1.31                   | 0.55                                 | Staggered | 100%                          | 100% | 100% | 100% | 100% | 100% | 0%  |
|        | 1.59                   | 0.55                                 | Staggered | 90%                           | 100% | 66%  | 100% | 93%  | 90%  | 13% |



|  |      |      |           |      |      |      |      |      |      |     |
|--|------|------|-----------|------|------|------|------|------|------|-----|
|  | 0.88 | 0.55 | Single    | 93%  | 93%  | 100% | 80%  | 73%  | 88%  | 10% |
|  | 1.06 | 0.55 | Single    | 27%  | 0%   | 0%   | 7%   | 0%   | 7%   | 10% |
|  | 1.17 | 0.55 | Single    | 0%   | 47%  | 47%  | 33%  | 33%  | 32%  | 17% |
|  | 1.31 | 0.55 | Single    | 0%   | 0%   | 0%   | 0%   | 0%   | 0%   | 0%  |
|  | 1.59 | 0.55 | Single    | 0%   | 0%   | 0%   | 0%   | 0%   | 0%   | 0%  |
|  | 0.38 | 1.00 | Single    | 100% | 100% | 100% | 100% | 100% | 100% | 0%  |
|  | 0.51 | 1.00 | Single    | 100% | 100% | 100% | 100% | 100% | 100% | 0%  |
|  | 0.65 | 1.00 | Single    | 100% | 100% | 100% | 100% | 100% | 100% | 0%  |
|  | 0.78 | 1.00 | Single    | 60%  | 20%  | 27%  | 20%  | 27%  | 31%  | 15% |
|  | 0.94 | 1.00 | Single    | 20%  | 47%  | 27%  | 7%   | 13%  | 23%  | 14% |
|  | 1.10 | 1.00 | Single    | 0%   | 0%   | 0%   | 0%   | 0%   | 0%   | 0%  |
|  | 1.02 | 0.41 | Staggered | 100% | 100% | 100% | 100% | 100% | 100% | 0%  |
|  | 1.18 | 0.41 | Staggered | 100% | 100% | 100% | 100% | 100% | 100% | 0%  |
|  | 1.34 | 0.41 | Staggered | 100% | 100% | 100% | 100% | 100% | 100% | 0%  |
|  | 1.64 | 0.41 | Staggered | 73%  | 73%  | 82%  | 73%  | 73%  | 75%  | 4%  |
|  | 1.92 | 0.41 | Staggered | 9%   | 0%   | 0%   | 27%  | 0%   | 7%   | 11% |
|  | 0.88 | 0.59 | Staggered | 100% | 100% | 100% | 100% | 100% | 100% | 0%  |
|  | 1.06 | 0.59 | Staggered | 100% | 100% | 100% | 100% | 100% | 100% | 0%  |
|  | 1.17 | 0.59 | Staggered | 97%  | 100% | 97%  | 97%  | 100% | 98%  | 2%  |
|  | 1.31 | 0.59 | Staggered | 97%  | 97%  | 97%  | 100% | 97%  | 97%  | 1%  |
|  | 1.59 | 0.59 | Staggered | 55%  | 48%  | 28%  | 31%  | 31%  | 39%  | 11% |
|  | 0.59 | 0.81 | Staggered | 100% | 100% | 100% | 100% | 100% | 100% | 0%  |
|  | 0.88 | 0.81 | Staggered | 92%  | 100% | 100% | 100% | 100% | 98%  | 3%  |

|                                                                                   |      |      |           |     |     |      |      |      |     |    |
|-----------------------------------------------------------------------------------|------|------|-----------|-----|-----|------|------|------|-----|----|
|  | 1.04 | 0.81 | Staggered | 92% | 92% | 100% | 100% | 100% | 97% | 4% |
|  | 1.15 | 0.81 | Staggered | 93% | 93% | 71%  | 86%  | 93%  | 87% | 8% |
|  | 1.28 | 0.81 | Staggered | 21% | 14% | 7%   | 14%  | 14%  | 14% | 5% |
